# Supplementary material
Source: PubMed Central journal article supplement (PMC4256769)
Supplement: 03cc127e2e081e32a135a0da79b3030e_genetics.114.168823-4.pdf [file 03cc127e2e081e32a135a0da79b3030e_genetics.114.168823-4.pdf]

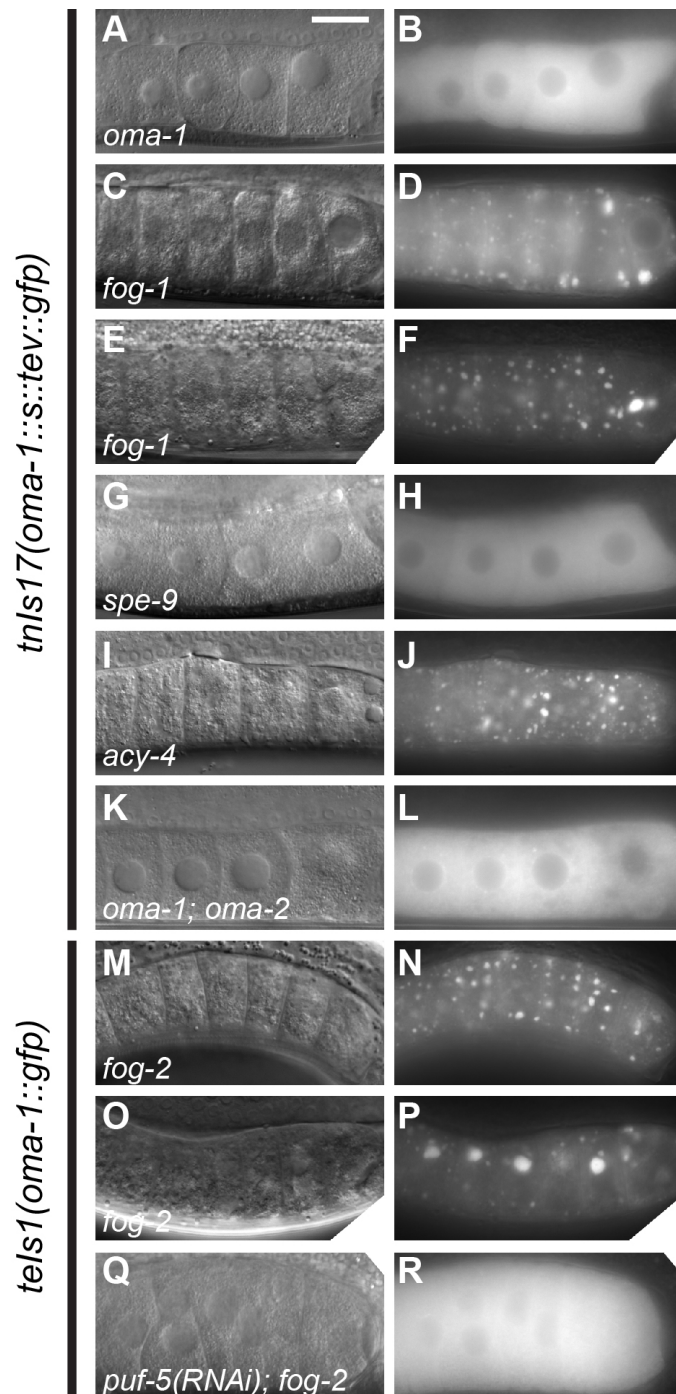

**Figure S1** OMA-1 reorganizes into large RNPs when sperm-dependent signaling is compromised. GFP-tagged OMA-1 aggregate when sperm are absent (D, F, N, P) or adenylate cyclase (*acy-4*) signaling in gonadal sheath cells is abrogated (J). Aggregation of OMA-1::GFP in the absence of sperm requires PUF-5 (R) and CAR-1 (C. Spike, unpublished results). OMA-1::GFP aggregates are most easily visualized in surface focal planes (F, J, N, P), but can also be seen in medial focal planes (D) where diffuse OMA-1::GFP is most easily visualized (B, H, L, R). DIC and GFP images of oocytes are on the right and left, respectively. Genotypes: *unc-119(ed3); oma-1(zu405te33); tnls17[oma-1::s::tev::gfp, unc-119(+)]* (A, B); *fog-1(q253ts); oma-1; tnls17* at 25°C; (C–F) *spe-9(hc88ts); oma-1; tnls17* at 25°C; (G, H) *acy-4(ok1806) tnls17* (I, J); *oma-1; oma-2(te51) tnls17* (K, L); *fog-2(q71); tels1[oma-1::gfp, unc-119(+)]* (M–P); *puf-5(RNAi); fog-2(q71); tels1* (Q, R). Bar, 20 μm.
