# Supplementary material
Source: PubMed Central journal article supplement (PMC4256769)
Supplement: 41d258093842e21502946a8ba424faf9_genetics.114.168823-1.pdf [file 41d258093842e21502946a8ba424faf9_genetics.114.168823-1.pdf]

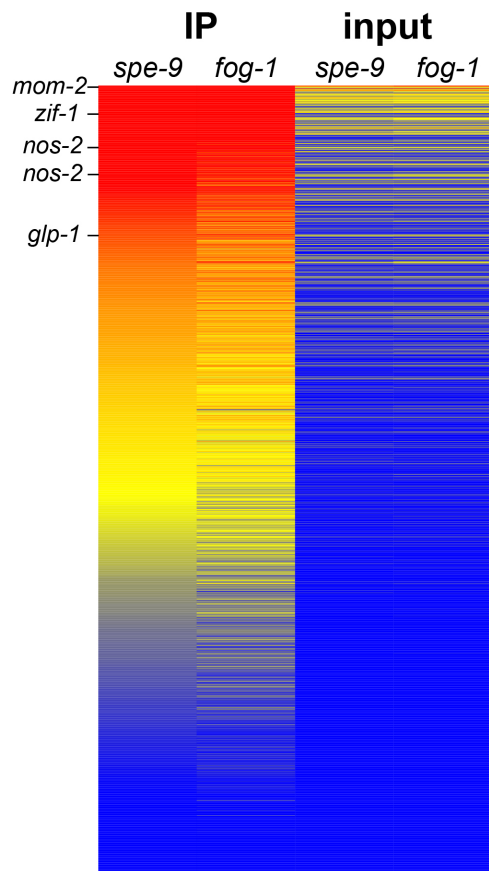

**Figure S3** Previously identified mRNA targets of OMA-dependent translational repression appear to be abundant in OMA-1 purifications. The average raw intensity values of probe sets up at least 2-fold in OMA-1 purifications ( $P(\text{corr}) \leq .05$ ) in the presence and absence of MSP-dependent signaling (*spe-9* and *fog-1* genotypes, respectively) are illustrated. Higher intensity values are in red (values  $\geq 90^{\text{th}}$  percentile in the *fog-1* purifications), mid-range values are in yellow ( $50^{\text{th}}$  percentile), and low intensity values are in blue ( $\leq 10^{\text{th}}$  percentile). The probe sets detecting *mom-2*, *zif-1*, *nos-2*, and *glp-1* all have high-intensity values in OMA-1 purifications (IP) and lower-intensity values in the input samples, which are shown for reference. Probe sets are ranked from high to low using the intensity values in the first column (*spe-9* purifications).
