# Supplementary material
Source: PubMed Central journal article supplement (PMC4256769)
Supplement: 50e924448cb7434df0ec1b2441425e55_genetics.114.168823-3.pdf [file 50e924448cb7434df0ec1b2441425e55_genetics.114.168823-3.pdf]

**Table S2 Relative quantification of *zif-1* and *nos-2* target mRNA levels in OMA-1 purifications (IPs) using RT-PCR and RNA sequencing**

|                         | RT-PCR                       |                              | RNAseq           |
|-------------------------|------------------------------|------------------------------|------------------|
|                         | <i>spe-9</i> IPs (Mean ± SD) | <i>fog-1</i> IPs (Mean ± SD) | <i>fog-1</i> IP4 |
| <i>zif-1/nos-2</i> mRNA | 5.7 ± 2.1                    | 5.6 ± 1.7                    | 5.1              |
