# Supplementary material
Source: PubMed Central journal article supplement (PMC4256769)
Supplement: 177cfc8b34a5ef514b032bce22f24c23_genetics.114.168823-2.pdf [file 177cfc8b34a5ef514b032bce22f24c23_genetics.114.168823-2.pdf]

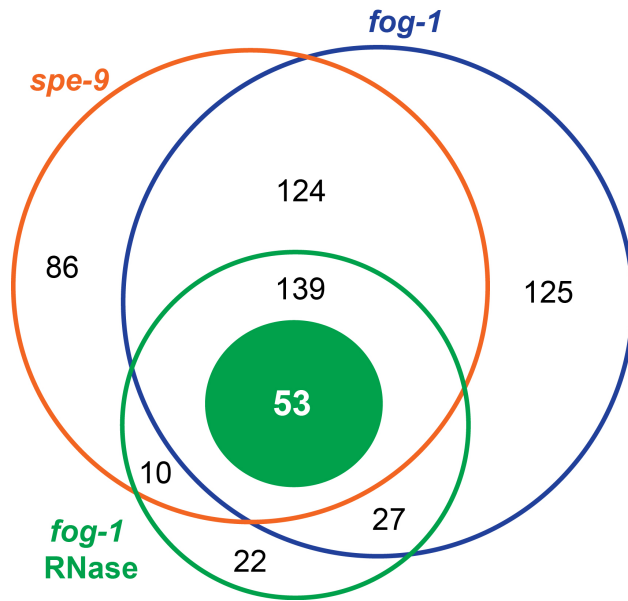

**Figure S8** Overlapping sets of proteins were identified in OMA-1 purifications. Identified proteins, counted as NCBI GI numbers with at least two peptide matches, are illustrated for each sample. Purifications performed in the presence of RNA (orange and blue circles) identified more proteins than the RNase-treated purification (empty green circle), with substantial overlap among all three samples. Proteins present in all three OMA-1 purifications, but absent from control purifications and not identified as abundant contaminants (see *Materials and Methods*), are candidates for proteins that interact with OMA-1 in oocytes (solid green circle). A few of the protein accession numbers appear to be redundant (e.g., GLD-2; see File S2). Such duplicates were removed from the numbers mentioned in the text. Because the yield of OMA RNPs appears greater when purifications are conducted from females as opposed to hermaphrodites, we did not conduct a large number of experimental replicates in an attempt to identify proteins that depend on the presence or absence of sperm for their association with OMA-1.
