# Supplementary material
Source: PubMed Central journal article supplement (PMC4256769)
Supplement: b0eaeb380a2e1b607ffa3cdfda588b6c_genetics.114.168823-12.pdf [file b0eaeb380a2e1b607ffa3cdfda588b6c_genetics.114.168823-12.pdf]

**A**

| Construct 3'UTR | Distal | Pachytene | Loop | Oocytes | Early Embryos |
|-----------------|--------|-----------|------|---------|---------------|
| <i>zif-1</i>    | ++     | +         | -    | -       | +             |
| <i>cdc-25.3</i> | ++     | ++        | +    | +/-     | +             |
| <i>rnp-1</i>    | ++     | ++        | +/-  | +/-     | +             |
| <i>rnf-5</i>    | ++     | ++        | +    | +       | -             |
| <i>fce-1</i>    | ++     | ++        | +    | +       | -             |
| <i>pqn-70</i>   | ++     | ++        | ++   | ++      | +             |
| <i>gap-2</i>    | +      | +         | +    | ++      | -             |
| <i>wdr-23</i>   | +      | ++        | +    | +       | -             |
| <i>rom-1</i>    | +      | ++        | +    | +       | -             |
| <i>fbf-2</i>    | ++     | +/-       | -    | -       | -             |

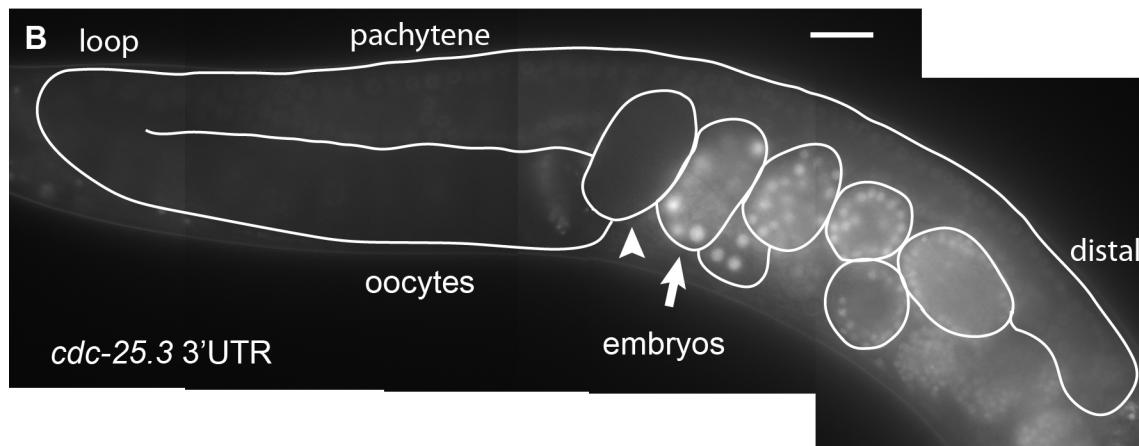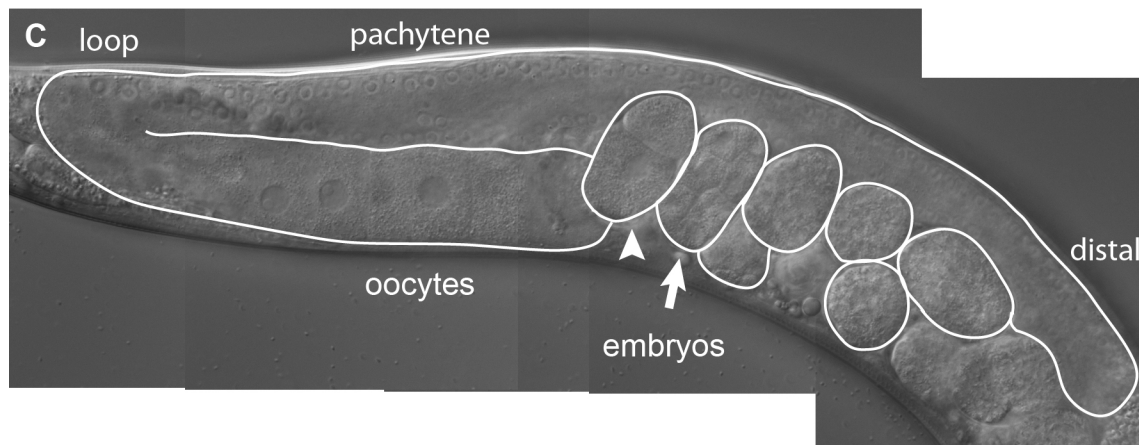

**Figure S5** Different patterns of GFP::H2B expression from the 3'UTR reporter transgenes described in the text. (A) The relative brightness of GFP::H2B expression in the germ lines of animals expressing each 3'UTR construct. GFP::H2B was either judged to be absent (-), sometimes present but very low and difficult to see (+/-), always present (+), or always present and bright relative to the other stages of germ line development (++) for that particular construct. Brightness levels represented here cannot be compared between the different 3'UTR constructs. GFP::H2B expression during early embryogenesis indicates the general trend (e.g., present or absent) rather than the relative strength of expression. Constructs that are repressed by *oma-1*

and *oma-2* are highlighted. Strongly repressed constructs are in dark gray and weakly repressed constructs in light gray. (B, C) GFP::H2B expression (B) from the *cdc-25.3* 3'UTR reporter construct in an otherwise wild-type animal (C). The U-shaped gonad arm and embryos are outlined, and the relative positions of the regions described in (A) are indicated. GFP::H2B is not expressed in 2-cell embryos (arrowhead) but is strongly expressed in slightly older embryos (arrow). Note that the images shown in Figure 4 and Figure S4, which often include pachytene nuclei as well as oocytes, are oriented as shown here. Bar, 20  $\mu\text{m}$ .
