# Supplementary material
Source: PubMed Central journal article supplement (PMC4256769)
Supplement: c3af6a02e162d4e1485b5547ee7c228b_genetics.114.168823-10.pdf [file c3af6a02e162d4e1485b5547ee7c228b_genetics.114.168823-10.pdf]

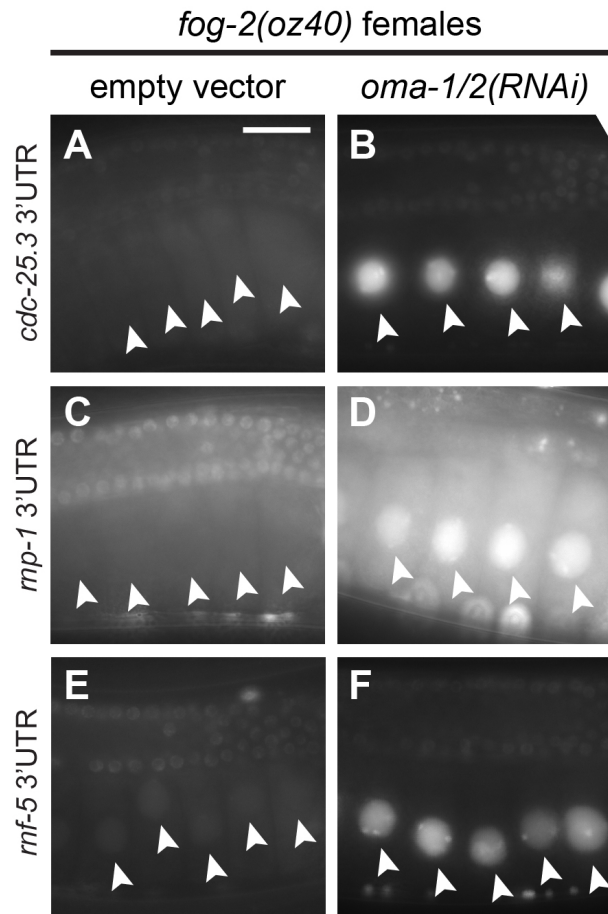

**Figure S7** GFP::H2B expression from reporter transgenes is increased in *fog-2(oz40)* females after *oma-1/2(RNAi)*. (A–F) The oocytes of *fog-2(oz40)* animals exposed to *oma-1/2(RNAi)* (B, D, F) were compared to the oocytes of *fog-2(oz40)* animals exposed to a non-targeting RNAi construct (A, C, E). Bar, 20  $\mu$ m.
