# Supplementary material
Source: PubMed Central journal article supplement (PMC4256769)
Supplement: de3a2eeca9d30e65ab5c3e34e5173528_genetics.114.168823-5.pdf [file de3a2eeca9d30e65ab5c3e34e5173528_genetics.114.168823-5.pdf]

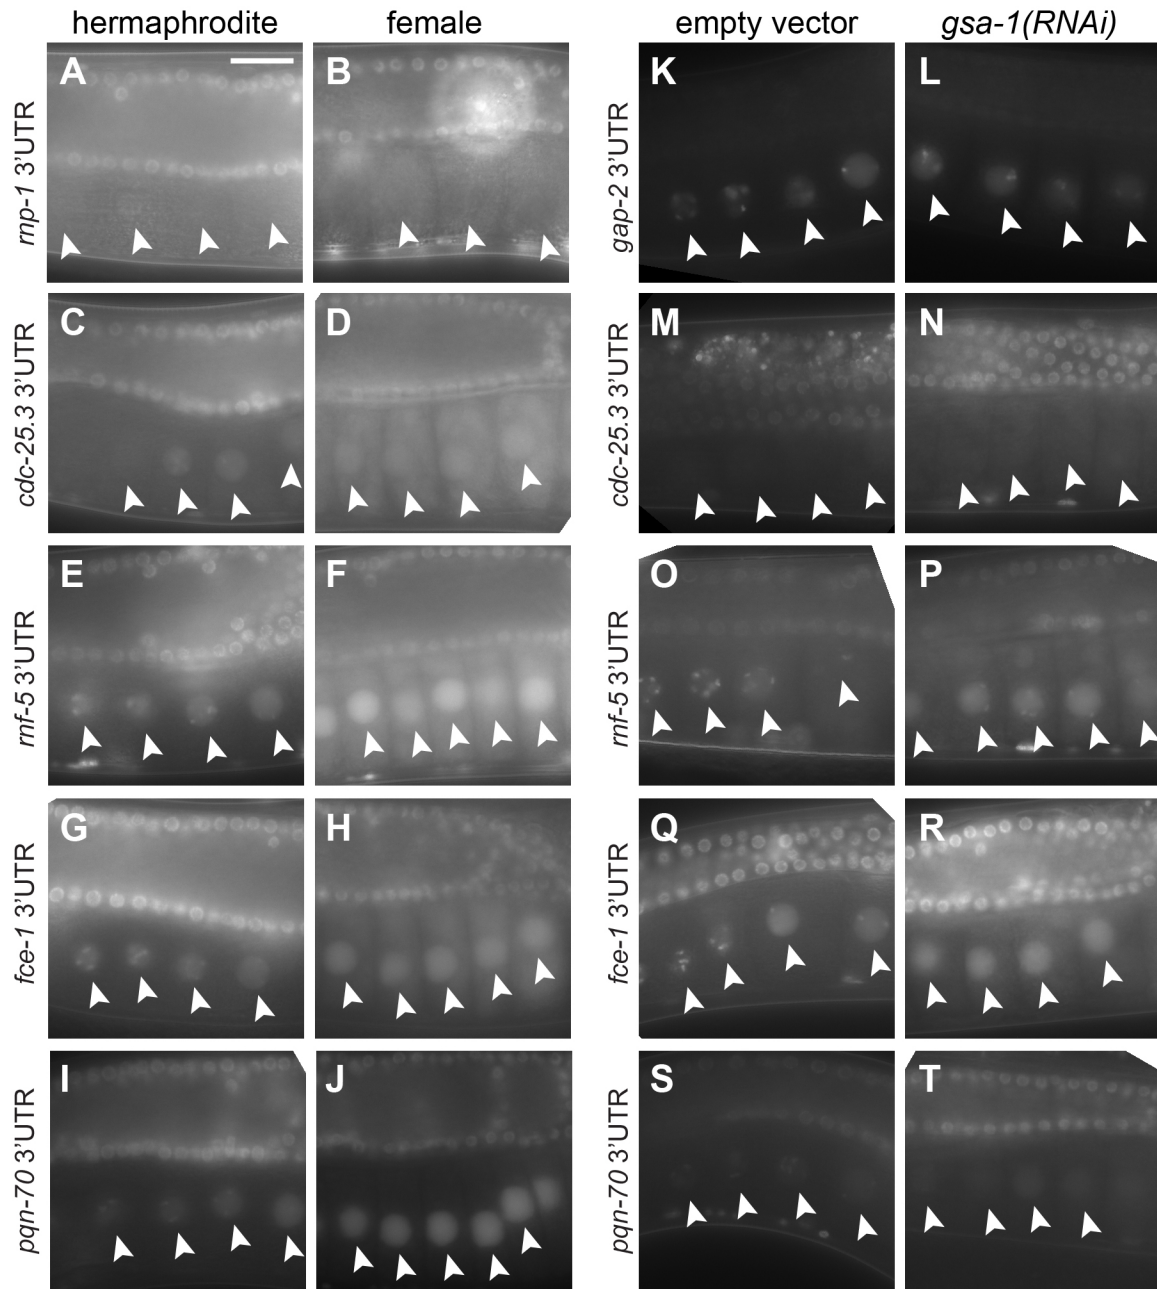

**Figure S6** GFP::H2B expression from reporter transgenes is not dramatically altered in oocytes with a reduced rate of oocyte maturation. (A–J) The oocytes of *fog-2(oz40)* females (B, D, F, H, J) were compared to the oocytes of hermaphrodites (A, C, E, G, I). (K–T) The oocytes of *gsa-1(RNAi)* animals (L, N, P, R, T) were compared to the oocytes of animals exposed to a non-targeting RNAi construct (K, M, O, Q, S). All animals were homozygous for the indicated 3'UTR reporter transgene. Modest, but reproducible, increases in nuclear GFP expression were observed for the *rnf-5* and *pqn-70* 3'UTR constructs in female oocytes (F, J). Nuclear GFP expression levels of the *rnf-5* 3'UTR construct increased even further after *oma-1/2(RNAi)* in *fog-2* females (Figure S7). Expression of all 3'UTR constructs, including the *rnp-1* construct, which is not shown, appeared to be unaffected by *gsa-1(RNAi)* (D. Coetzee, unpublished results). Bar, 20  $\mu$ m.
