# Supplementary material
Source: PubMed Central journal article supplement (PMC4256769)
Supplement: f84e28b48bea3a568cbfbfe7f22989dd_genetics.114.168823-9.pdf [file f84e28b48bea3a568cbfbfe7f22989dd_genetics.114.168823-9.pdf]

**Table S1 C. elegans strains used for this study**

| Strain | Genotype                                                                                                                                                                                       |
|--------|------------------------------------------------------------------------------------------------------------------------------------------------------------------------------------------------|
| N2     | Wild type, Bristol isolate                                                                                                                                                                     |
| BS553  | <i>fog-2(oz40)</i> V                                                                                                                                                                           |
| TX174  | <i>oma-1(zu405te33)</i> IV                                                                                                                                                                     |
| TX431  | <i>oma-2(te51)</i> V                                                                                                                                                                           |
| DG2507 | <i>oma-1(zu405te33)</i> IV/ <i>nT1[qIs51]</i> (IV;V); <i>oma-2(te51)</i> V/ <i>nT1[qIs51]</i> (IV;V)                                                                                           |
| DG2531 | <i>unc-119(ed3)</i> III; <i>oma-1(zu405te33)</i> IV; <i>tnIs17[pCS410 oma-1p::oma-1::s::tev::gfp, pDPMM0016B unc-119(+)]</i> V                                                                 |
| DG2460 | <i>spe-9(hc88ts)</i> I; <i>oma-1(zu405te33)</i> IV                                                                                                                                             |
| DG2462 | <i>fog-1(q253ts)</i> I; <i>oma-1(zu405te33)</i> IV                                                                                                                                             |
| DG2566 | <i>fog-1(q253ts)</i> I; <i>oma-1(zu405te33)</i> IV; <i>tnIs17[pCS410 oma-1p::oma-1::s::tev::gfp, pDPMM0016B unc-119(+)]</i> V                                                                  |
| DG2581 | <i>spe-9(hc88ts)</i> I; <i>oma-1(zu405te33)</i> IV; <i>tnIs17[pCS410 oma-1p::oma-1::s::tev::gfp, pDPMM0016B unc-119(+)]</i> V                                                                  |
| DG2620 | <i>unc-119(ed3)</i> III; <i>oma-1(zu405te33)</i> IV; <i>oma-2(te51)</i> <i>tnIs17[pCS410 oma-1p::oma-1::s::tev::gfp, pDPMM0016B unc-119(+)]</i> V                                              |
| DG2632 | <i>acy-4(ok1806)</i> <i>tnIs17[pCS410 oma-1p::oma-1::s::tev::gfp, pDPMM0016B unc-119(+)]</i> V/ <i>nT1[qIs51]</i> (IV;V)                                                                       |
| DG2713 | <i>fog-2(q71)</i> V; <i>teIs1[pRL475 oma-1p::oma-1::GFP, pDPMM016 unc-119(+)]</i>                                                                                                              |
| DG3212 | <i>unc-119(ed3)</i> III; <i>tnIs36[pCS450 pie-1p::gfp::h2b::cdc-25.3 3'UTR, unc-119(+)]</i>                                                                                                    |
| DG3228 | <i>unc-119(ed3)</i> III; <i>tnIs48[pCS450 pie-1p::gfp::h2b::cdc-25.3 3'UTR, unc-119(+)]</i>                                                                                                    |
| DG3238 | <i>unc-119(ed3)</i> III; <i>tnIs53[pCS456 pie-1p::gfp::h2b::rnf-5 3'UTR, unc-119(+)]</i>                                                                                                       |
| DG3239 | <i>unc-119(ed3)</i> III; <i>tnIs54[pCS456 pie-1p::gfp::h2b::rnf-5 3'UTR, unc-119(+)]</i>                                                                                                       |
| DG3242 | <i>unc-119(ed3)</i> III; <i>tnIs57[pCS458 pie-1p::gfp::h2b::rnp-1 3'UTR, unc-119(+)]</i>                                                                                                       |
| DG3262 | <i>unc-119(ed3)</i> III; <i>tnIs64[pCS464 pie-1p::gfp::h2b::fce-1 3'UTR, unc-119(+)]</i>                                                                                                       |
| DG3275 | <i>unc-119(ed3)</i> III; <i>tnIs77[pCS466 pie-1p::gfp::h2b::pqn-70 3'UTR, unc-119(+)]</i>                                                                                                      |
| DG3278 | <i>unc-119(ed3)</i> III; <i>tnIs80[pCS468 pie-1p::gfp::h2b::wdr-23 3'UTR, unc-119(+)]</i>                                                                                                      |
| DG3300 | <i>unc-119(ed3)</i> III; <i>tnIs87[pDC5 pie-1p::gfp::h2b::rom-1 3'UTR, unc-119(+)]</i>                                                                                                         |
| DG3309 | <i>unc-119(ed3)</i> III; <i>tnIs93[pDC22 pie-1p::gfp::h2b::gap-2 3'UTR, unc-119(+)]</i>                                                                                                        |
| DG3328 | <i>unc-119(ed3)</i> III; <i>tnIs95[pDC18 pie-1p::gfp::h2b::fbf-2 3'UTR, unc-119(+)]</i>                                                                                                        |
| DG3333 | <i>unc-119(ed3)</i> III; <i>oma-2(te51)</i> V; <i>tnIs64[pCS464 pie-1p::gfp::h2b::fce-1 3'UTR, unc-119(+)]</i>                                                                                 |
| DG3336 | <i>unc-119(ed3)</i> III; <i>oma-2(te51)</i> V; <i>tnIs57[pCS458 pie-1p::gfp::h2b::rnp-1 3'UTR, unc-119(+)]</i>                                                                                 |
| DG3359 | <i>unc-119(ed3)</i> III; <i>oma-1(zu405te33)</i> IV; <i>tnIs36[pCS450 pie-1p::gfp::h2b::cdc-25.3 3'UTR, unc-119(+)]</i>                                                                        |
| DG3385 | <i>unc-119(ed3)</i> III; <i>oma-2(te51)</i> V; <i>tnIs77[pCS466 pie-1p::gfp::h2b::pqn-70 3'UTR, unc-119(+)]</i>                                                                                |
| DG3600 | <i>unc-119(ed3)</i> III; <i>oma-1(zu405te33)</i> IV/ <i>nT1[qIs51]</i> (IV;V); <i>oma-2(te51)</i> V/ <i>nT1[qIs51]</i> (IV;V); <i>tnIs53[pCS456 pie-1p::gfp::h2b::rnf-5 3'UTR, unc-119(+)]</i> |
| TX1248 | <i>unc-119(ed3)</i> <i>teIs114[pRL2701 pie-1p::gfp::h2b::zif-1 3'UTR, unc-119(+)]</i> III                                                                                                      |
| DG3246 | <i>fog-2(oz40)/+</i> V; <i>tnIs57[pCS458 pie-1p::gfp::h2b::rnp-1 3'UTR, unc-119(+)]</i>                                                                                                        |
| DG3261 | <i>fog-2(oz40)/+</i> V; <i>tnIs36[pCS450 pie-1p::gfp::h2b::cdc-25.3 3'UTR, unc-119(+)]</i>                                                                                                     |
| DG3284 | <i>fog-2(oz40)/+</i> V; <i>tnIs64[pCS464 pie-1p::gfp::h2b::fce-1 3'UTR, unc-119(+)]</i>                                                                                                        |
| DG3285 | <i>fog-2(oz40)/+</i> V; <i>tnIs54[pCS456 pie-1p::gfp::h2b::rnf-5 3'UTR, unc-119(+)]</i>                                                                                                        |

**Table S1 (continued) *C. elegans* strains used for this study**

| Strain | Genotype                                                                                                                                                            |
|--------|---------------------------------------------------------------------------------------------------------------------------------------------------------------------|
| DG3286 | <i>fog-2(oz40)/+ V; tnls53[pCS45 (pie-1p::gfp::h2b::rnf-5 3'UTR, unc-119(+)]</i>                                                                                    |
| DG3302 | <i>fog-2(oz40)/+ V; tnls77[pCS466 pie-1p::gfp::h2b::pqn-70 3'UTR, unc-119(+)]</i>                                                                                   |
| DG3306 | <i>fog-2(oz40)/+ V; tnls48[pCS450 pie-1p::gfp::h2b::cdc-25.3 3'UTR, unc-119(+)]</i>                                                                                 |
| DG3338 | <i>rnp-1(ok1549) V/nT1[qIs51] (IV;V)</i>                                                                                                                            |
| DG3371 | <i>fog-3(q470) unc-13(e1091)/++ I; rnp-1(ok1549)V/nT1[qIs51] (IV;V)</i>                                                                                             |
| DG3155 | <i>cdc-25.3(ok358) III</i>                                                                                                                                          |
| DG3502 | <i>lin-41(ma104) I; unc-119(ed3) tels114[pRL2701 pie-1p::gfp::h2b::zif-1 3'UTR, unc-119(+)] III</i>                                                                 |
| DG3501 | <i>lin-41(ma104) I</i>                                                                                                                                              |
| DG3786 | <i>lin-41(tn1487s) I/hT2 (I;III); unc-119(ed3) III/ hT2[bli-4(e937) let-?(q782) qIs48] (I;III);<br/>tnls36[pCS450 pie-1p::gfp::h2b::cdc-25.3 3'UTR, unc-119(+)]</i> |
| DG3792 | <i>lin-41(tn1487s) I; unc-119(ed3) tels114[pRL2701 pie-1p::gfp::h2b::zif-1 3'UTR, unc-119(+)] III</i>                                                               |
| DG2882 | <i>lin-41(n2914) I/hT2 (I;III); unc-119(ed3) tels114[pRL2701 pie-1p::gfp::h2b::zif-1 3'UTR, unc-119(+)]<br/>III /hT2[bli-4(e937) let-?(q782) qIs48] (I;III)</i>     |
