# Supplementary material
Source: PubMed Central journal article supplement (PMC4256769)

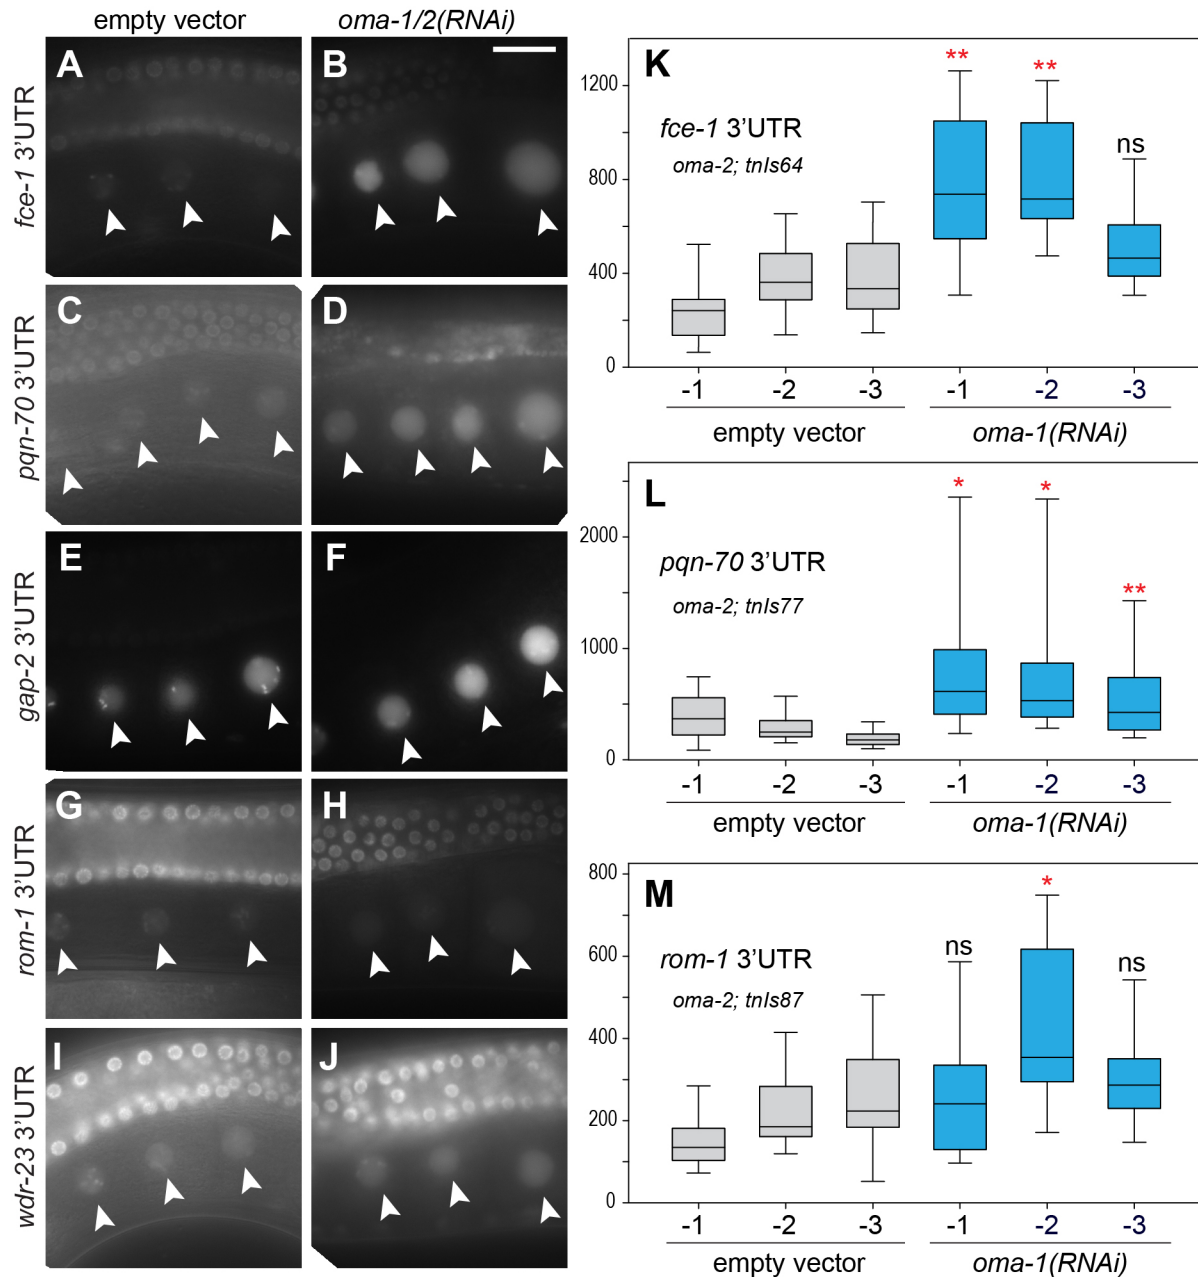

Supplement: ba14156e1029903156a750c6c696a78b_genetics.114.168823-6.pdf [file ba14156e1029903156a750c6c696a78b_genetics.114.168823-6.pdf]
